# Supplementary material
Source: publisher figshare collection journal article supplement (https://acs.figshare.com/ndownloader/files/4688782)
Supplement: Supplementary file 1 [file 4688782]

## SUPPORTING INFORMATION SECTION

### Theoretical Background:

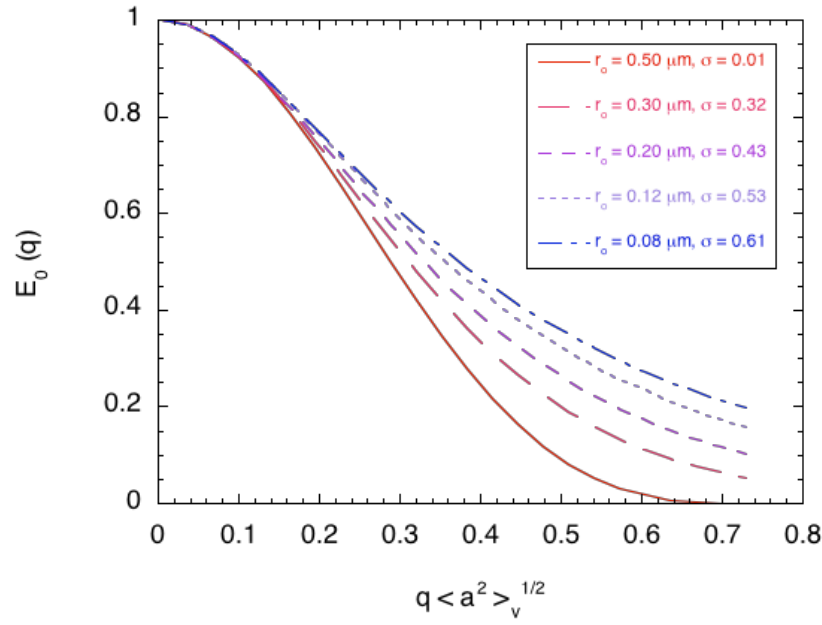

**Figure SI-1.** Effects of size polydispersity induced by log-normal distributions of radii. Echo attenuation functions at long diffusion time are drawn. The number average  $\langle a^2 \rangle_v$  is kept constant,  $\sqrt{\langle a^2 \rangle_v} = 0.5 \mu\text{m}$ ,  $r_0$  varies between  $0.08 \mu\text{m}$  and  $0.5 \mu\text{m}$  with corresponding widths  $\sigma$  ranging from 0.61 to 0.01.

### Experimental results:

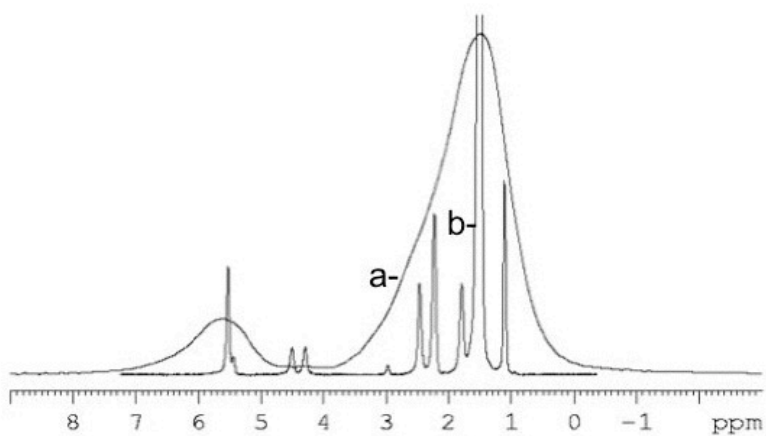

**Figure SI-2.** 400 MHz  $^1\text{H}$  NMR spectra. (a) lettuce seeds, Fourier Transform of a spin-echo at  $2\tau = 12$  ms. (b) spectrum of a pure olive oil sample recorded with a single pulse excitation. Low resolution of seeds spectrum is due to the heterogeneous packing of seeds in the NMR tube.

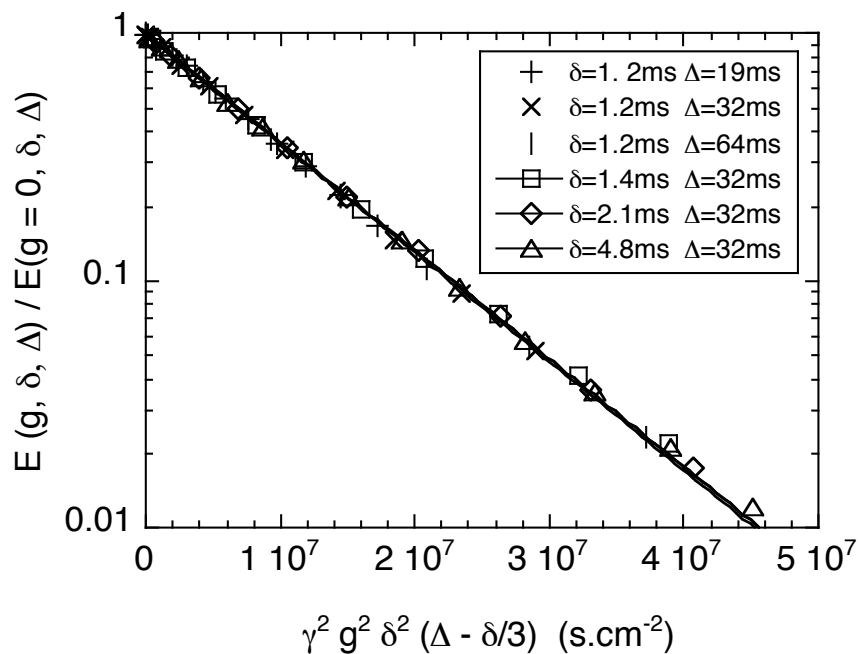

**Figure SI-3.** Pure olive oil sample. The proton echo attenuations  $E(g, \delta, \Delta)$  are recorded at 298 K. The continuous line is the fit of the experimental data with the Stejskal and Tanner equation yielding  $D_s = 1.04 \pm 0.08 \cdot 10^{-7} \text{ cm}^2/\text{s}$ .

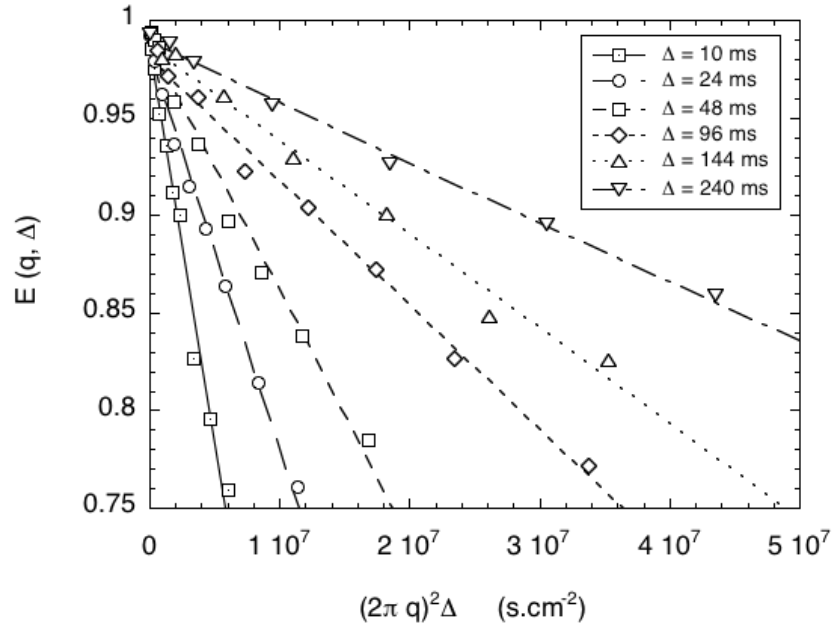

**Figure SI-4.** Lettuce seeds. Linear plot, at low  $q$ , of  $E(q, \Delta)$  versus  $(2\pi q)^2 \Delta$ ; the slopes of the straight lines determine the apparent self-diffusion coefficient  $D_{app}(\Delta)$  of TAG molecules in oil-bodies (eq 5).

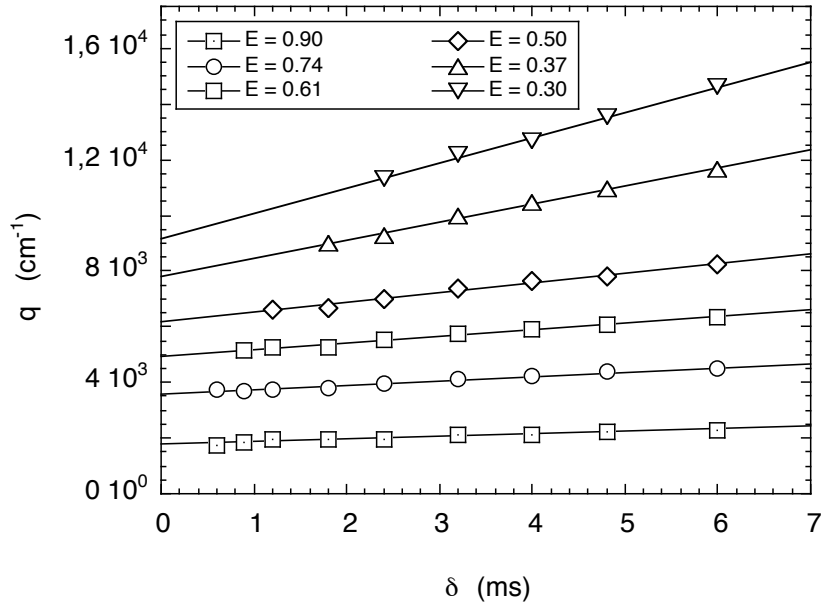

**Figure SI-5.** Lettuce seeds. Plot of experimental values  $q$  that generate  $E(q) = 0.90$  ( $\square$ ),  $0.74$  ( $\circ$ ),  $0.61$  ( $\square$ ),  $0.50$  ( $\diamond$ ),  $0.37$  ( $\triangle$ ) and  $0.30$  ( $\nabla$ ). Linear variations  $q(\delta)$  are evidenced;  $q$  values extrapolated to  $\delta = 0$  are the wave vector magnitudes  $q_{\text{eff}}$  in agreement with the SGP approximation.

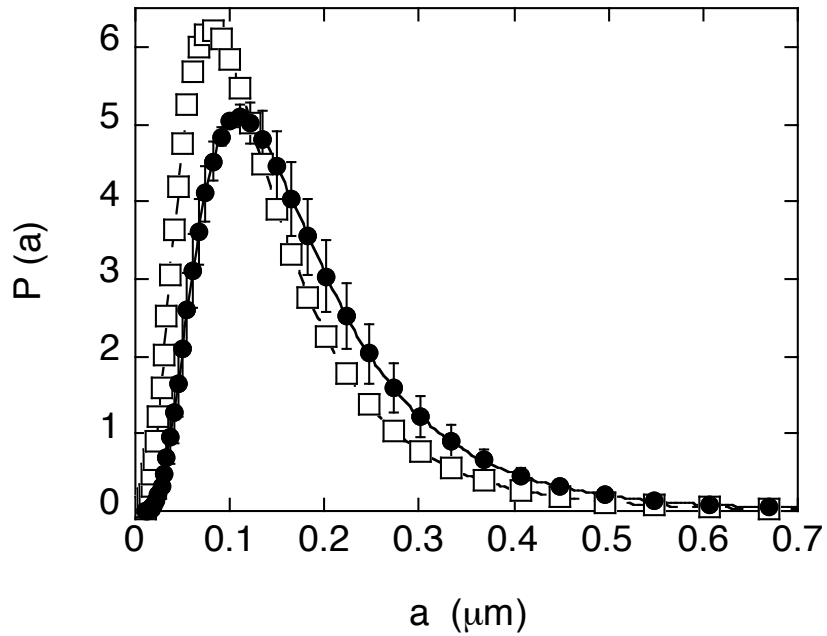

**Figure SI-6.** Normalized log-normal distributions of the lettuce oil-bodies radius obtained from the simulation of SGP ( $q_{\text{eff}}$ ) (●) and from the GPD analysis of the PFGSE function measured with the longest gradient pulse delay ( $\delta = 6$  ms) (□).

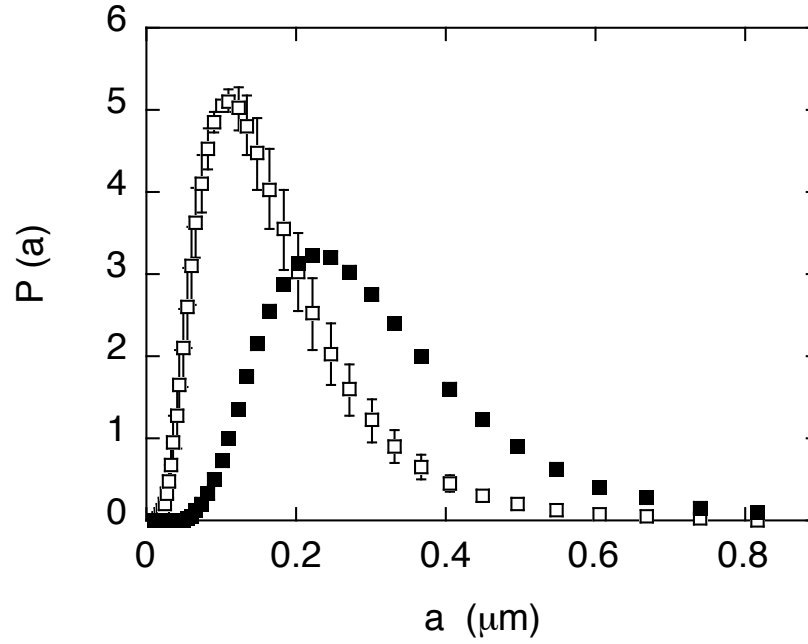

**Figure SI-7.** Normalized log-normal radius distributions for tomato oil-bodies (■) and lettuce oil-bodies (□). The distribution parameters are  $r_o = 0.23$   $\mu\text{m}$ ,  $\sigma = 0.48$  and  $r_o = 0.11$   $\mu\text{m}$ ,  $\sigma = 0.60$  respectively.
